# Supplementary material for: The long-term impact of restricted access to abortion on children’s socioeconomic outcomes
Source: PLOS journal article supplement (doi:10.1371/journal.pone.0248638), 2021-03-15
Supplement: S5 (10.1371/journal.pone.0248638.s005) [file journal.pone.0248638.s005]

**S3 Table. Compositional differences between mothers under age 35 and mothers over age 35 giving birth before the law change came to effect.**

| Outcomes                          | Under 35 | Over 35 | Diff.  | p     | N <sub>Under35</sub> | N <sub>Over35</sub> |
|-----------------------------------|----------|---------|--------|-------|----------------------|---------------------|
| (1) Marital status: married       | 0.938    | 0.943   | -0.005 | 0.792 | 304                  | 245                 |
| (2) Marital status: single        | 0.030    | 0.016   | 0.013  | 0.295 | 304                  | 245                 |
| (3) Number of children: 1 or 2    | 0.378    | 0.327   | 0.052  | 0.207 | 304                  | 245                 |
| (4) Education: University         | 0.046    | 0.020   | 0.026  | 0.089 | 304                  | 245                 |
| (5) Education: High school        | 0.102    | 0.082   | 0.020  | 0.410 | 304                  | 245                 |
| (6) Education: Vocational school  | 0.016    | 0.020   | -0.004 | 0.734 | 304                  | 245                 |
| (7) Education: Primary            | 0.836    | 0.878   | -0.042 | 0.160 | 304                  | 245                 |
| (8) Working                       | 0.641    | 0.522   | 0.119  | 0.005 | 304                  | 245                 |
| (9) Occupation: non-manual        | 0.251    | 0.263   | -0.012 | 0.811 | 207                  | 137                 |
| (11) Mother's language: Hungarian | 0.987    | 0.976   | 0.011  | 0.340 | 304                  | 245                 |
| (10) Place of residence: city     | 0.431    | 0.449   | -0.018 | 0.673 | 304                  | 245                 |

The table shows the compositional differences between mothers under age 35 and over age 35 who gave birth in April-June 1974, i.e. before the law change came to effect. The table shows the results of two-sample t-tests with unequal variances. Mothers under age 35 at the time of conception were 33.88-35.38 years old when giving birth. Mothers over 35 at the time of conception were 35.77-37.27 years old when giving birth.
